# Supplementary material for: Enhanced thermoelectric performance of copper iodide particles/nanowires composite in the low-temperature range
Source: Royal Society of Chemistry journal article supplement (doi:10.1039/d4dt02048k), 2024-01-01
Supplement: d4dt02048k1.pdf [file d4dt02048k1.pdf]

## Supporting Information

### Enhanced Thermoelectric Performance of Copper Iodide Particles/Nanowires Composite in the Low-Temperature Range

Oju Kwon<sup>1</sup>, Minsu Kim<sup>1</sup>, Dabin Park<sup>3</sup> and Jooheon Kim<sup>1,2\*</sup>

1. School of Chemical Engineering, Chung-Ang University, Seoul 06974, Republic of  
Korea
2. Department of Intelligent Energy and Industry, Graduate School, Chung-Ang  
University, Seoul 06974, Republic of Korea
3. Department of Mechanical and Aerospace Engineering, University of California,  
Irvine, California 92679, USA

\*Corresponding author: Jooheon Kim, E-mail address: jooheonkim@cau.ac.kr

## Supporting Information:

### Figures

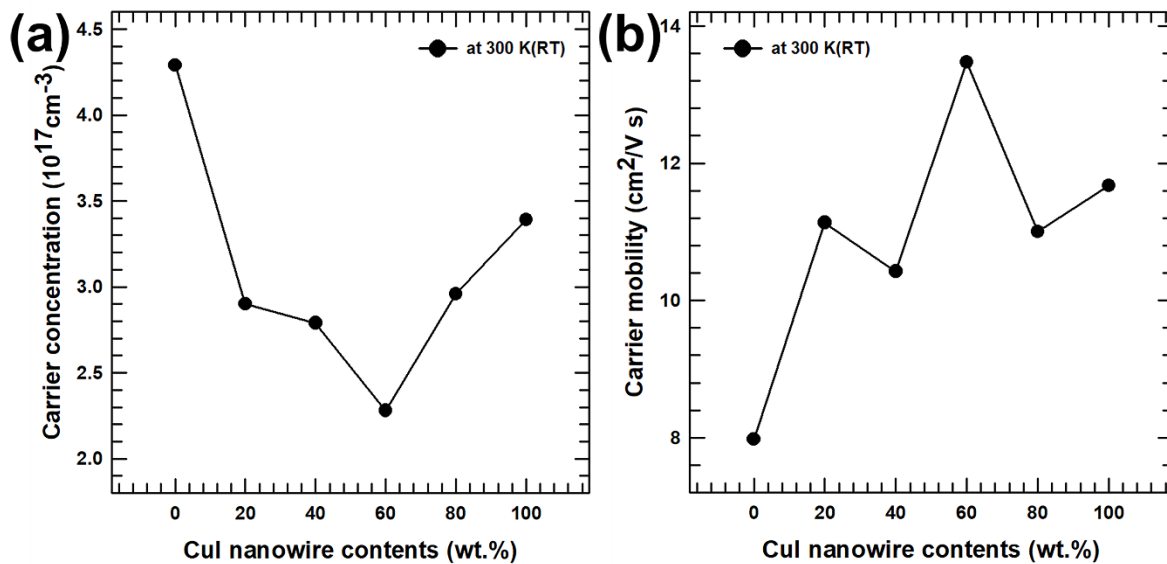

Fig. S1. CuI nanowire content dependence of (a) carrier concentration and (b) carrier mobility for CuI composites at 300 K.

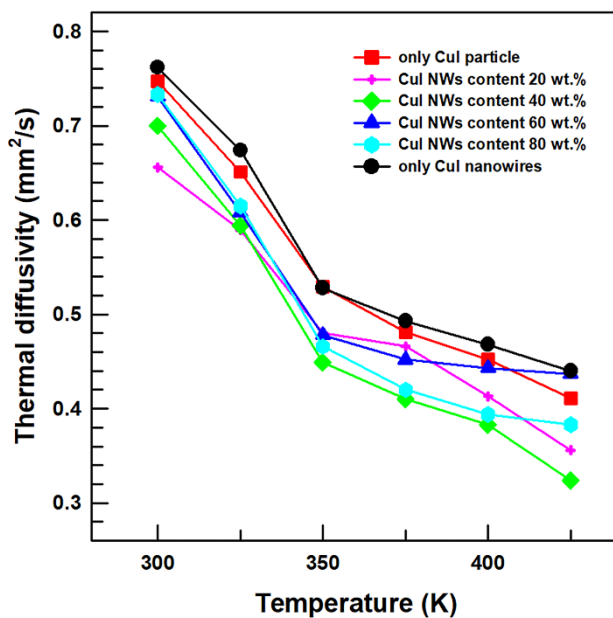

Fig. S2. Temperature-dependent thermal diffusivity of each CuI composite.
